# Supplementary material for: 1H Nuclear Magnetic Resonance (NMR) Metabolomic Study of Chronic Organophosphate Exposure in Rats
Source: Metabolites. 2012 Jul 24;2(3):479–95. doi: 10.3390/metabo2030479 (PMC3901221; doi:10.3390/metabo2030479)

## Supplemental Material

### $^1\text{H}$ NMR Metabolomic Study of Chronic Organophosphate Exposure in Rats

Todd M. Alam, Muniasamy Neerathilingam, M. Kathleen Alam, David E. Volk, G. A. Shakeel Ansari, Swapna Sarkar and Bruce A. Luxon

**Figure S1:** The evolution of the VIP scores for selected metabolites following OSC-PLSDA analysis on individual weeks. The VIP scores were determined for classification of control, TBP and TPP chronic exposure.

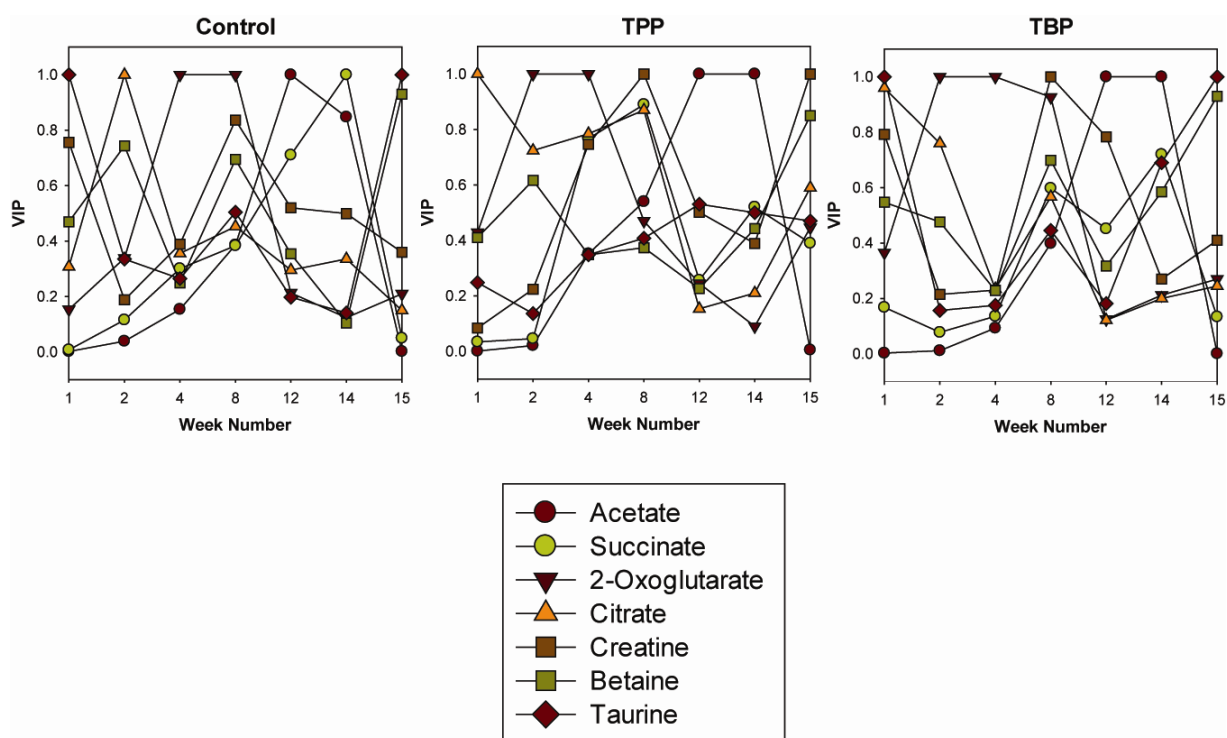

Supplement: Supplementary File 1 — PDF-Document (PDF, 114 KB) [file metabolites-02-00479-s001.pdf]
